# Supplementary material for: Enriched expression of NF1 in inhibitory neurons in both mouse and human brain
Source: Springer Nature journal article supplement (doi:10.1186/s13041-019-0481-0), 2019-06-24
Supplement: MOESM1 [file 25663740]

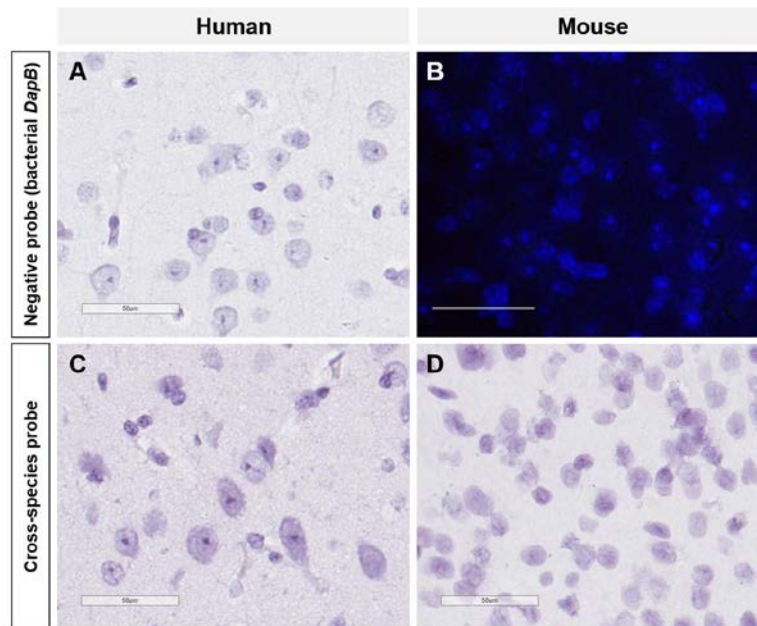

**Figure S1.** Representative image of *in situ* hybridization by using a negative control probe or cross-species probes in human and mouse cortex. (A-B) Human (A) or mouse (B) cortex samples were hybridized with a probe targeting *DapB* by using a fluorescent or chromogenic hybridization method, respectively. No *DapB* signal (blue in A, red in B) was detected. Slices were counter-stained with hematoxylin or DAPI. (C-D) Cross-species hybridization. (C) Human cortex sample was hybridized with the mouse *NfI* probe (blue). (D) Mouse cortex sample was hybridized with the human *NfI* probe (blue). Slices were counter-stained with hematoxylin. Scale bars, 50  $\mu\text{m}$ .
